# Supplementary material for: Characteristic of TIGIT and DNAM‐1 Expression on Foxp3+ γδ T Cells in AML Patients
Source: Hindawi journal article supplement (doi:10.1155/2020/4612952), 2020-01-01
Supplement: f1 [file 4612952.f1.pdf]

Supplementary Table 1: The characteristic of AML patients and healthy individuals

| Factor                   | AML-NR      | <i>de novo</i> AML | AML-CR       | HI           |
|--------------------------|-------------|--------------------|--------------|--------------|
| The number of the case   | 7           | 27                 | 12           | 21           |
| Age                      | 66          | 62                 | 50.5         | 57           |
| (median; range)          | (35-90)     | (18-88)            | (24-78)      | (25-83)      |
| Gender                   | (5/2)       | (14/13)            | (5/7)        | (11/10)      |
| (Male / Female)          |             |                    |              |              |
| Clinical index           |             |                    |              |              |
| WBC (10 <sup>9</sup> /L) | 4.3         | 6.0                | 4.8          | 6.2          |
| (median; range)          | (0.3-29.4)  | (1.0-132.7)        | (2.1-9.9)    | (4.4-8.5)    |
| PLT (10 <sup>9</sup> /L) | 24.0        | 40.0               | 152.3        | 226.0        |
| (median; range)          | (1.0-248.0) | (1.0-632.0)        | (12.0-555.0) | (97.0-300.0) |
| RBC (10 <sup>9</sup> /L) | 2.3         | 2.2                | 3.3          | 4.9          |
| (median; range)          | (1.9-2.8)   | (1.1-3.9)          | (1.9-4.4)    | (4.1-5.9)    |
| Hb (g/L)                 | 59.0        | 70.0               | 93.5         | 145.0        |
| (median; range)          | (8.0-71.0)  | (48.0-116.0)       | (61.0-138.0) | (91.0-165.0) |
| Blast (%)                | 80          | 44                 | 0            | /            |
| (median; range)          | (29-93)     | (21-95)            | (0-5)        |              |
| FAB classification       |             |                    |              |              |
| M1                       | 0           | 1                  | 1            | /            |
| M2                       | 0           | 5                  | 2            | /            |
| M3                       | 1           | 5                  | 5            | /            |
| M4                       | 0           | 2                  | 1            | /            |
| M5                       | 4           | 8                  | 1            | /            |
| Undetermined             | 2           | 6                  | 2            | /            |
| Therapy                  |             |                    |              | /            |
| Chemotherapy             | 7           | 27                 | 12           | /            |
| Transplantation          | 0           | 1                  | 0            | /            |

Notes: WBC: white blood cell, RBC: red blood cell, PLT: platelet, Hb: hemoglobin,

F: female, M: male, CR: complete remission, NR: no remission

Supplementary Table 2: The clinical information of *de novo* AML patients

| Case No. | Disease status | Subtype      | Genotype                      | Chemotherapy     |
|----------|----------------|--------------|-------------------------------|------------------|
| P8       | <i>de novo</i> | M5           | ND                            | SC               |
| P9       | <i>de novo</i> | M2           | ND                            | Azacitidine      |
| P10      | <i>de novo</i> | M1           | FLT3-ITD, CEBPA               | DHA              |
| P11      | <i>de novo</i> | M5           | DNMT3A, IDH2, SRSF2, RUNX1    | MA               |
| P12      | <i>de novo</i> | M3           | ND                            | Refused therapy  |
| P13      | <i>de novo</i> | M2b          | AML1-ETO                      | SC               |
| P14      | <i>de novo</i> | M3           | FLT3-ITD, PML-RAR $\alpha$    | ATRA+ATO         |
| P15      | <i>de novo</i> | M2           | K-RAS, DEK-CAN, EA2-HLF       | DCAG             |
| P16      | <i>de novo</i> | Undetermined | AML1-ETO, TET2, RUNX1-RUNX1T1 | IA               |
| P17      | <i>de novo</i> | M2           | MLL-ELL                       | DA               |
| P18      | <i>de novo</i> | M3           | PML-RAR $\alpha$              | ATRA+ATO         |
| P19      | <i>de novo</i> | Undetermined | TP53                          | DCAG             |
| P20      | <i>de novo</i> | M5           | MLL-AF9, EVI1                 | IA               |
| P21      | <i>de novo</i> | M4           | ND                            | IDA+ Azacitidine |
| P22      | <i>de novo</i> | M3           | PML-RAR $\alpha$              | ATRA+ATO         |
| P23      | <i>de novo</i> | M5           | FLT3-ITD, CEBPA               | IA               |
| P24      | <i>de novo</i> | M5           | ATM, JAK2, CXCR4              | Ara-C+DCA        |
| P25      | <i>de novo</i> | M5           | FLT3                          | IA               |
| P26      | <i>de novo</i> | Undetermined | ND                            | IA               |
| P27      | <i>de novo</i> | Undetermined | NPM1                          | DA               |
| P28      | <i>de novo</i> | Undetermined | ND                            | Refused therapy  |
| P29      | <i>de novo</i> | Undetermined | NRAS, TP53, STAG2             | IA               |
| P30      | <i>de novo</i> | M5           | ND                            | SC               |
| P31      | <i>de novo</i> | M4           | TET2, SF3B1                   | DCAG             |
| P32      | <i>de novo</i> | M2           | ND                            | DA               |
| P33      | <i>de novo</i> | M3           | PML-RAR $\alpha$              | ATRA+ATO         |
| P34      | <i>de novo</i> | M5           | ND                            | IA               |

Notes: ND: not detected; DHA: daunorubicin+ homoharringtonine + cytarabine; MA: mitoxantrone+ cytarabine; SC: supportive care; ATRA: all-trans-retinoic acid; ATO: arsenic trioxide; DA: daunorubicin+ cytarabine; DCAG: decitabine+ aclarubicin + cytarabine+ recombinant granulocyte colony-stimulating factor; IA: idarubicin+ cytarabine; IDA: idarubicin; DCA: Decitabine; Ara-C: cytarabine
